# Supplementary material
Source: PubMed Central journal article supplement (PMC8367195)
Supplement: mmc1.pdf [file mmc1.pdf]

# THE LANCET

## Infectious Diseases

### Supplementary appendix 1

This translation in Chinese was submitted by the authors and we reproduce it as supplied. It has not been peer reviewed. *The Lancet's* editorial processes have only been applied to the original in English, which should serve as reference for this manuscript.

Supplement to: Wan EYF, Chui CSL, Lai FTT, et al. Bell's palsy following vaccination with mRNA (BNT162b2) and inactivated (CoronaVac) SARS-CoV-2 vaccines: a case series and nested case-control study. *Lancet Infect Dis* 2021; published online August 16. [https://doi.org/10.1016/S1473-3099\(21\)00451-5](https://doi.org/10.1016/S1473-3099(21)00451-5).

此简体中文译文由作者提交，我方按照提供的版本刊登。此译文并未经过同行审阅。医学期刊《柳叶刀》的编辑流程仅适用于英文原稿，英文原稿应作为此手稿的参考。

## 接种新型冠状病毒 mRNA 疫苗 (BNT162b2) 和灭活疫苗 (CoronaVac) 后贝尔氏麻痹症之病例系列和巢式病例对照研究

### 摘要

背景：贝尔氏麻痹症是新型冠状病毒 (COVID-19) 疫苗临床试验中须报告的其中一种罕见不良事件，然而目前文献中尚缺乏基于人口的研究以对 COVID-19 灭活疫苗与贝尔氏麻痹症之间的关联作评估。本研究的目的是评估 BNT162b2 和 CoronaVac 疫苗接种后贝尔氏麻痹症的发生风险。

方法：本病例系列研究 (case series study) 和巢式病例对照研究 (nested case-control study) 在中国香港进行，使用来自医院管理局的主动监测报告和电子健康记录，以及面向医疗专业人员的 COVID-19 疫苗不良事件网上报告系统，对 BNT162b2 (复星-BioNTech/辉瑞-BioNTech) 及 CoronaVac (香港科兴) 两种疫苗接种后 42 天内发生贝尔氏麻痹症的风险进行评估。本研究描述了疫苗接种后发生贝尔氏麻痹症的病例特征 (CoronaVac 组的年龄为 18-110 岁，BNT162b2 组的年龄为 16-110 岁)，并对接种 CoronaVac 或 BNT162b2 疫苗后 42 天内贝尔氏麻痹症临床确诊病例的年龄标准化发病率与香港人口的基线发病率进行了比较。在巢式病例对照研究中，病例组和对照组按年龄、性别、就诊类别和就诊日期进行了一比四匹配，计算了贝尔氏麻痹症风险和接种疫苗的优势比 (odds ratio, OR)。

结果：在 2021 年 2 月 23 日至 5 月 4 日期间，共 451939 人接种了首剂 CoronaVac 疫苗，537205 人接种了首剂 BNT162b2 疫苗。CoronaVac 疫苗接种后报告了 28 例临床确诊的贝尔氏麻痹症，年龄标准化发病率为 66.9 / 10 万人年 (95% CI: 37.2-96.6)；BNT162b2 接种后报告 16 例贝尔氏麻痹症，年龄标准化发病率为 42.8 / 10 万人年 (95% CI: 19.4-66.1)。与基线发病率相比，CoronaVac 疫苗接种组的年龄标准化发病率差值为 41.5 / 10 万人年 (95% CI: 11.7 - 71.4)，BNT162b2 疫苗接种组的发病率差值为 17.0 / 10 万人年 (95% CI: -6.6 - 40.6)，相当于每 10 万人接种 CoronaVac 疫苗或 BNT162b2 疫苗后 42 天内，分别增加 4.8 和 2.0 例贝尔氏麻痹症。在巢式病例对照分析中，298 例病例与 1181 例对照进行了匹配分析，CoronaVac 疫苗组调整后的 OR 为 2.385 (95% CI: 1.415-4.022)，BNT162b2 疫苗组调整后的 OR 为 1.755 (95% CI: 0.886 - 3.477)。

结论：本研究发现接种 CoronaVac 疫苗后贝尔氏麻痹症的发生风险有所增高。然而，接种 COVID-19 灭活疫苗的益处远远超过了不良事件的风险。同时，本研究的发现亦需要更多来自不同地区的研究来印证。
