# Supplementary material
Source: PubMed Central journal article supplement (PMC8367195)
Supplement: mmc2.pdf [file mmc2.pdf]

# THE LANCET

## Infectious Diseases

### Supplementary appendix 2

This appendix formed part of the original submission and has been peer reviewed. We post it as supplied by the authors.

Supplement to: Wan EYF, Chui CSL, Lai FTT, et al. Bell's palsy following vaccination with mRNA (BNT162b2) and inactivated (CoronaVac) SARS-CoV-2 vaccines: a case series and nested case-control study. *Lancet Infect Dis* 2021; published online August 16. [https://doi.org/10.1016/S1473-3099\(21\)00451-5](https://doi.org/10.1016/S1473-3099(21)00451-5).

## Supplementary Appendix

Supplementary Table 1. Vaccination program priority groups rollout schedule in Hong Kong

| Order of expansion | Date of rollout | Vaccination group                                                                                                                                                                                                                                                                                                                                                                                                                                                                     |
|--------------------|-----------------|---------------------------------------------------------------------------------------------------------------------------------------------------------------------------------------------------------------------------------------------------------------------------------------------------------------------------------------------------------------------------------------------------------------------------------------------------------------------------------------|
| First [1]          | 26 Feb, 2021    | <ul style="list-style-type: none"> <li>• Healthcare workers and staff involved in anti-epidemic work</li> <li>• Persons aged 60 or above and a maximum of 2 carers accompanying elderly people aged above 70</li> <li>• Residents and staff of residential care homes for the elderly and persons with disabilities</li> <li>• People providing essential public services</li> <li>• People providing cross-boundary transportation or working at control points and ports</li> </ul> |
| Second [2]         | 8 Mar, 2021     | <ul style="list-style-type: none"> <li>• Staff of food and beverages premises, markets, supermarkets, convenience stores, couriers and takeaway delivery</li> <li>• Staff of local public transport service operators</li> <li>• Registered construction workers</li> <li>• Staff of property management</li> <li>• Teachers and school staff</li> <li>• Staff in the tourism industry</li> <li>• Staff of scheduled premises under the Prevention and Control of Disease</li> </ul>  |
| Third [3]          | 16 Mar, 2021    | <ul style="list-style-type: none"> <li>• People aged between 30 and 59</li> <li>• Students aged 16 or above studying outside Hong Kong</li> <li>• Domestic helpers</li> </ul>                                                                                                                                                                                                                                                                                                         |
| Four [4]           | 15 Apr, 2021    | <ul style="list-style-type: none"> <li>• People aged 16 to 29 (18 for person receiving Sinovac vaccine)</li> </ul>                                                                                                                                                                                                                                                                                                                                                                    |

### References:

1. The Government of the Hong Kong Special Administrative Region. Government announces 2019 COVID-19 Vaccination Programme. Press Releases. 18 Feb 2021 (<https://www.info.gov.hk/gia/general/202102/18/P2021021800767.htm?fontSize=1>)
2. The Government of the Hong Kong Special Administrative Region. Government expands scope of priority groups and opens more CVCs. Press Releases. 8 Mar 2021 (<https://www.info.gov.hk/gia/general/202102/18/P2021021800767.htm?fontSize=1>)
3. The Government of the Hong Kong Special Administrative Region. Vaccination priority groups to be expanded to cover people aged 30 or above. Press Releases. 15 Mar 2021 (<https://www.info.gov.hk/gia/general/202103/15/P2021031500626.htm?fontSize=1>)
4. The Government of the Hong Kong Special Administrative Region. COVID-19 Vaccination Programme opens to persons aged 16 or above. Press Releases. 15 Apr 2021 (<https://www.info.gov.hk/gia/general/202104/15/P2021041500565.htm?fontSize=1>)

Supplementary Table 2. Characteristics of the reported cases of Bell's palsy to the Department of Health

| Case No.                                                      | Sex | Age | COVID-19 Vaccine Dose Received | Interval to symptom onset | Side affected | Clinical outcomes (As of 31 May 2021)                                                                                                         | Causality assessment<br><br>(For clinically confirmed Bell's palsy case)† |
|---------------------------------------------------------------|-----|-----|--------------------------------|---------------------------|---------------|-----------------------------------------------------------------------------------------------------------------------------------------------|---------------------------------------------------------------------------|
| <b>Clinically confirmed cases after CoronaVac vaccination</b> |     |     |                                |                           |               |                                                                                                                                               |                                                                           |
| S1                                                            | M   | 69  | First                          | 2 hours                   | Left          | Fully recovered with treatment.                                                                                                               | B2                                                                        |
| S2                                                            | M   | 72  | First                          | 6 days                    | Right         | Almost fully recovered with treatment.                                                                                                        | B1                                                                        |
| S3                                                            | M   | 86  | First                          | 13 days                   | Left          | Good recovery with treatment. Mild left angle of mouth weakness at last follow-up on 13 Apr 2021 (28 days after symptom onset.)               | B1                                                                        |
| S4                                                            | M   | 52  | First                          | 16 days                   | Left          | Almost fully recovered with treatment.                                                                                                        | B1                                                                        |
| S5                                                            | M   | 54  | First                          | 8 days                    | Left          | Good recovery with treatment. Slight residual palsy on left corner of mouth at last follow-up on 9 Apr 2021 (24 days after symptom onset).    | B1                                                                        |
| S6                                                            | M   | 74  | First                          | 6 days                    | Left          | Lost to follow up.                                                                                                                            | B1                                                                        |
| S7                                                            | M   | 58  | First                          | 17 days                   | Left          | No follow up was scheduled.                                                                                                                   | B1                                                                        |
| S8                                                            | M   | 79  | First                          | 14 days                   | Left          | Follow up was scheduled and pending assessment.                                                                                               | B2                                                                        |
| S9                                                            | M   | 76  | First                          | 14 days                   | Left          | Fully recovered with treatment                                                                                                                | B1                                                                        |
| S10                                                           | M   | 26  | First                          | 1 hour                    | Left          | Almost fully recovered with treatment. Minimal drooping of left angle of mouth at last follow up on 6 May 2021 (43 days after symptom onset). | B2                                                                        |

|     |   |    |        |           |       |                                                                                                                                                              |    |
|-----|---|----|--------|-----------|-------|--------------------------------------------------------------------------------------------------------------------------------------------------------------|----|
| S11 | M | 67 | Second | 3 days    | Right | Good recovery with treatment. Facial weakness improved at last follow-up on 5 May 2021 (37 days after symptom onset).                                        | B1 |
| S12 | M | 48 | First  | 2 days    | Left  | Lost to follow up.                                                                                                                                           | B1 |
| S13 | F | 36 | Second | 3 days    | Right | Almost fully recovered without treatment.                                                                                                                    | D  |
| S14 | F | 38 | First  | 3 days    | Left  | Good recovery with treatment. Complete eyelid closure with mild decreased left face movement at last follow-up on 20 May 2021 (51 days after symptom onset). | B1 |
| S15 | M | 63 | Second | 1 day     | Left  | Good recovery with treatment. Facial asymmetry improved at last follow-up on 7 May 2021 (32 days after symptom onset).                                       | B1 |
| S16 | F | 31 | First  | 19 days   | Left  | Good recovery with treatment. Complete eyelid closure at last follow-up on 6 May 2021 (29 days after symptom onset).                                         | B1 |
| S17 | F | 66 | Second | 2 days    | Right | Follow up was scheduled and pending assessment.                                                                                                              | B1 |
| S18 | F | 64 | First  | 1-2 weeks | Left  | Good recovery with treatment. Facial asymmetry improved at last follow-up on 4 May 2021 (40-47 days after symptom onset).                                    | B1 |
| S19 | M | 35 | Second | 1 day     | Right | Good recovery with treatment. Facial weakness improved with complete eyelid closure at last follow-up on 26 Apr 2021 (16 days after symptom onset).          | B1 |
| S20 | M | 44 | First  | 16 days   | Right | Good recovery with treatment. Functions of right facial nerve improved at last follow-up on 10 May 2021 (30 days after symptom onset).                       | B1 |
| S21 | F | 50 | First  | 17 days   | Left  | Good recovery with treatment. Facial weakness improved at last follow-up on 28 May 2021 (48 days after symptom onset).                                       | B1 |
| S22 | M | 35 | Second | 13 days   | Left  | Similar left facial weakness at last follow-up on 18 May 2021 (33 days after symptom onset).                                                                 | B1 |

|                                                               |   |    |        |         |                |                                                                                                                                                            |    |
|---------------------------------------------------------------|---|----|--------|---------|----------------|------------------------------------------------------------------------------------------------------------------------------------------------------------|----|
| S23                                                           | F | 52 | First  | 26 days | Left           | Lost to follow up.                                                                                                                                         | B1 |
| S24                                                           | M | 59 | Second | < 1 day | Left           | Fair recovery with treatment. Symptoms slightly improved at last follow up on 5 May 2021 (9 days after symptom onset).                                     | B1 |
| S25                                                           | F | 57 | Second | 16 days | Left           | Follow up was scheduled on 20 May 2021 and pending follow up information on clinical progress.                                                             | B1 |
| S26                                                           | M | 71 | Second | 17 days | Left           | Follow up was scheduled on 31 May 2021 and pending follow up information on clinical progress.                                                             | B1 |
| S27                                                           | M | 32 | First  | 21 days | Right          | Fully recovered with treatment.                                                                                                                            | B1 |
| S28                                                           | F | 87 | First  | 42 days | Left           | Follow up was scheduled and pending assessment.                                                                                                            | B1 |
| <b>Excluded cases after CoronaVac vaccination</b>             |   |    |        |         |                |                                                                                                                                                            |    |
| S29                                                           | M | 57 | First  | 1 day   | Left           | Attending physician reviewed the case and revised the diagnosis to Ramsay Hunt Syndrome.                                                                   |    |
| S30                                                           | M | 55 | First  | 2 days  | Not Applicable | Attending physician reviewed the case and considered not Bell's palsy. The case discharged against medical advice and no specific diagnosis was concluded. |    |
| S31                                                           | M | 56 | Second | 2 hours | Left           | Attending physician reviewed the case and considered not Bell's palsy.                                                                                     |    |
| S32                                                           | F | 40 | First  | 3 days  | Left           | Attending physician reviewed the case and revised the diagnosis to rhinitis.                                                                               |    |
| S33                                                           | M | 69 | Second | 28 days | Right          | Attending physician reviewed the case and revised the diagnosis to Ramsay Hunt Syndrome.                                                                   |    |
| <b>Clinically confirmed cases after Comirnaty vaccination</b> |   |    |        |         |                |                                                                                                                                                            |    |
| B1                                                            | M | 37 | First  | 6 days  | Right          | Good recovery with treatment. Complete eyelid closure at last follow-up on 20 Apr 2021 (32 days after symptom onset).                                      | B2 |

|     |   |    |        |         |       |                                                                                                                                                                                   |    |
|-----|---|----|--------|---------|-------|-----------------------------------------------------------------------------------------------------------------------------------------------------------------------------------|----|
| B2  | F | 48 | First  | 18 days | Left  | Lost to follow up.                                                                                                                                                                | B1 |
| B3  | M | 58 | Second | 1 day   | Left  | Good recovery with treatment. Complete eyelid closure at last follow-up on 14 May 2021 (37 days after symptom onset).                                                             | B1 |
| B4  | M | 46 | Second | 3 days  | Left  | Good recovery with treatment. Facial weakness much improved at last follow-up on 5 May 2021 (26 days after symptom onset).                                                        | B1 |
| B5  | F | 65 | First  | 20 days | Right | Good recovery with treatment. Facial weakness much improved at last follow-up on 10 May 2021 (30 days after symptom onset).                                                       | B1 |
| B6  | F | 50 | Second | 1 day   | Left  | Almost fully recovered with treatment.                                                                                                                                            | B1 |
| B7  | M | 33 | First  | 4 days  | Left  | Lost to follow up                                                                                                                                                                 | D  |
| B8  | M | 69 | Second | 12 days | Left  | Good recovery with treatment. Complete eyelid closure at last follow-up on 28 Apr 2021 (8 days after symptom onset).                                                              | B1 |
| B9  | M | 52 | Second | 14 days | Right | Good recovery with treatment. Lower face asymmetry resolved and only minimal different in forehead wrinkles noted at last follow-up on 20 May 2021 (27 days after symptom onset). | B1 |
| B10 | F | 46 | First  | 16 days | Right | Good recovery with treatment. Facial weakness improved at last follow-up on 26 Apr 2021 (4 days after symptom onset).                                                             | B1 |
| B11 | M | 54 | First  | 18 days | Right | Good recovery with treatment. Facial weakness improved, complete eyelid closure, forehead wrinkle reappeared at last follow-up on 6 May 2021 (8 days after symptom onset).        | B1 |
| B12 | M | 47 | Second | 18 days | Right | Lost to follow-up                                                                                                                                                                 | B1 |
| B13 | F | 20 | Second | 17 days | Left  | Follow up was scheduled on 13 May 2021 and pending follow up information on clinical progress.                                                                                    | B1 |
| B14 | F | 42 | First  | 17 days | Right | Lost to follow up.                                                                                                                                                                | B1 |

|                                                   |   |    |        |         |       |                                                                                                                                                |    |
|---------------------------------------------------|---|----|--------|---------|-------|------------------------------------------------------------------------------------------------------------------------------------------------|----|
| B15                                               | M | 78 | First  | 2 days  | Right | Good recovery with treatment. Facial weakness improved at last follow-up on 27 May 2021 (26 days after symptom onset).                         | B1 |
| B16                                               | M | 41 | Second | 13 days | Left  | Fair recovery with treatment. Facial asymmetry improved as reported by the case at last follow-up on 7 May 2021 (13 days after symptom onset). | B1 |
| <b>Excluded cases after Comirnaty vaccination</b> |   |    |        |         |       |                                                                                                                                                |    |
| B17                                               | M | 58 | First  | 1 day   | Left  | Attending physician reviewed the case and considered not Bell's palsy.                                                                         |    |
| B18                                               | M | 72 | First  | 3 days  | Right | Attending physician reviewed the case and revised the diagnosis to ischemic stroke.                                                            |    |
| B19                                               | M | 71 | First  | 2 days  | Right | Attending physician reviewed the case and revised the diagnosis to Ramsay Hunt Syndrome.                                                       |    |
| B20                                               | F | 71 | Second | 8 days  | Right | Attending physician reviewed the case and revised the diagnosis to Ramsay Hunt Syndrome.                                                       |    |

† WHO classification:

A. Consistent causal association to immunization

- A1. Vaccine product-related reaction; or
- A2. Vaccine quality defect-related reaction; or
- A3. Immunization error-related reaction; or
- A4. Immunization anxiety-related reaction/Immunization stress related response (ISRR).

B. Indeterminate

- B1. Temporal relationship is consistent but there is insufficient definitive evidence that vaccine caused the event (it may be a new vaccine-linked event). This is a potential signal and needs to be considered for further investigation.
- B2. Reviewing factors result in conflicting trends of consistency and inconsistency with causal association to immunization (i.e. it may be vaccine-associated as well as coincidental and it is not possible clearly to favour one or the other).

C. Inconsistent causal association to immunization (coincidental). This could be due to underlying or emerging condition(s) or conditions caused by exposure to something other than vaccine. Events which could have occurred naturally are generally assigned this classification.

D. Case without adequate information for causality conclusion.

Supplementary Table 3. Standardized rate ratios of reported and clinically confirmed Bell's palsy cases following vaccination with CoronaVac and Comirnaty by sex, with reference to 2019

|                  | Age-standardised background incidence rate in 2019* per 100,000 person-years (95% CI) | Age-standardised incidence per 100,000 person-years (95% CI) |                      | Standardised incidence difference per 100,000 person-years (95% CI) |                      | Standardised rate ratio (95% CI) |                      |
|------------------|---------------------------------------------------------------------------------------|--------------------------------------------------------------|----------------------|---------------------------------------------------------------------|----------------------|----------------------------------|----------------------|
|                  |                                                                                       | Reported                                                     | Clinically confirmed | Reported                                                            | Clinically confirmed | Reported                         | Clinically confirmed |
| <b>CoronaVac</b> |                                                                                       |                                                              |                      |                                                                     |                      |                                  |                      |
| Total            | 27.7 (24.8-30.7)                                                                      | 75.3 (44.7-105.9)                                            | 66.9 (37.2- 96.6)    | 47.6 (16.8- 78.3)                                                   | 39.2 (9.3-69.0)      | 2.72 (1.78-4.14)                 | 2.41 (1.53-3.81)     |
| Male             | 30.3 (25.6-34.9)                                                                      | 88.7 (45.7-131.6)                                            | 77.6 (36.1-119.2)    | 58.4 (15.2-101.6)                                                   | 47.4 (5.6-89.2)      | 2.93 (1.76-4.87)                 | 2.57 (1.47-4.48)     |
| Female           | 25.7 (21.9-29.6)                                                                      | 55.9 (15.1- 96.6)                                            | 51.9 (11.9- 91.9)    | 30.1 (-10.8- 71.0)                                                  | 26.2 (-14.0-66.3)    | 2.17 (1.03-4.56)                 | 2.02 (0.92-4.42)     |
| <b>Comirnaty</b> |                                                                                       |                                                              |                      |                                                                     |                      |                                  |                      |
| Total            | 26.2 (23.1-29.3)                                                                      | 57.8 (30.1- 85.5)                                            | 42.8 (19.4- 66.1)    | 31.6 (3.7- 59.5)                                                    | 16.6 (-7.0-40.2)     | 2.21 (1.35-3.62)                 | 1.63 (0.93-2.86)     |
| Male             | 28.5 (23.7-33.4)                                                                      | 65.5 (26.9-104.2)                                            | 46.1 (14.6- 77.5)    | 37.0 (-1.9- 76.0)                                                   | 17.5 (-14.3-49.4)    | 2.30 (1.24-4.24)                 | 1.61 (0.80-3.26)     |
| Female           | 24.3 (20.3-28.4)                                                                      | 46.1 (8.7- 83.5)                                             | 36.4 (4.2- 68.7)     | 21.7 (-15.9- 59.4)                                                  | 12.1 (-20.4-44.6)    | 1.89 (0.83-4.33)                 | 1.50 (0.61-3.68)     |

\*The background incidence rates were calculated using the same reporting period in 2019 as for each vaccination programme in 2021 (for CoronaVac, February 23, 2021-May 4, 2021; For Comirnaty, March 6, 2021-May 4, 2021).



Supplementary Table 4. Standardised rate ratios of reported and clinically confirmed Bell's palsy cases following vaccination with CoronaVac and Comirnaty by sex, with reference to 2018

|                  | Age-standardised background incidence rate in 2018 per 100,000 person-years (95% CI) | Age-standardised incidence per 100,000 person-years (95% CI) |                      | Standardised incidence difference per 100,000 person-years (95% CI) |                      | Standardised rate ratio (95% CI) |                      |
|------------------|--------------------------------------------------------------------------------------|--------------------------------------------------------------|----------------------|---------------------------------------------------------------------|----------------------|----------------------------------|----------------------|
|                  |                                                                                      | Reported                                                     | Clinically confirmed | Reported                                                            | Clinically confirmed | Reported                         | Clinically confirmed |
| <b>CoronaVac</b> |                                                                                      |                                                              |                      |                                                                     |                      |                                  |                      |
| Total            | 25.8 (22.9-28.7)                                                                     | 75.3 (44.7-105.9)                                            | 66.9 (37.2- 96.6)    | 49.5 (18.8- 80.3)                                                   | 41.1 (11.3-71.0)     | 2.92 (1.92-4.45)                 | 2.60 (1.64-4.10)     |
| Male             | 28.7 (24.1-33.3)                                                                     | 88.7 (45.7-131.6)                                            | 77.6 (36.1-119.2)    | 60.0 (16.8-103.1)                                                   | 48.9 (7.2-90.7)      | 3.09 (1.86-5.14)                 | 2.70 (1.55-4.73)     |
| Female           | 23.4 (19.7-27.1)                                                                     | 55.9 (15.1- 96.6)                                            | 51.9 (11.9- 91.9)    | 32.5 ( -8.4- 73.3)                                                  | 28.5 (-11.6-68.7)    | 2.39 (1.13-5.03)                 | 2.22 (1.01-4.87)     |
| <b>Comirnaty</b> |                                                                                      |                                                              |                      |                                                                     |                      |                                  |                      |
| Total            | 25.5 (22.4-28.6)                                                                     | 57.8 (30.1- 85.5)                                            | 42.8 (19.4- 66.1)    | 32.3 (4.4- 60.2)                                                    | 17.3 (-6.3-40.9)     | 2.27 (1.38-3.72)                 | 1.68 (0.96-2.94)     |
| Male             | 29.0 (24.0-33.9)                                                                     | 65.5 (26.9-104.2)                                            | 46.1 (14.6- 77.5)    | 36.6 (-2.4- 75.5)                                                   | 17.1 (-14.8-49.0)    | 2.26 (1.23-4.18)                 | 1.59 (0.79-3.22)     |
| Female           | 22.6 (18.7-26.5)                                                                     | 46.1 (8.7- 83.5)                                             | 36.4 (4.2- 68.7)     | 23.5 (-14.1- 61.1)                                                  | 13.8 (-18.7-46.3)    | 2.04 (0.89-4.67)                 | 1.61 (0.65-3.97)     |

\*The background incidence rates were calculated using the same reporting period in 2018 as for each vaccination programme in 2021 (for CoronaVac, February 23, 2021-May 4, 2021; For Comirnaty, March 6, 2021-May 4, 2021).

Supplementary Table 5. Standardised rate ratios of reported and clinically confirmed Bell's palsy cases following vaccination with CoronaVac and Comirnaty by sex, with reference to the average background incidence rate from 2015 to 2019.

|                  | Average age-standardised background incidence rate from 2015 to 2019* per 100,000 person-years (95% CI) | Age-standardised incidence per 100,000 person-years (95% CI) |                      | Age-standardised incidence difference per 100,000 person-years (95% CI) |                      | Age-standardised rate ratio (95% CI) |                      |
|------------------|---------------------------------------------------------------------------------------------------------|--------------------------------------------------------------|----------------------|-------------------------------------------------------------------------|----------------------|--------------------------------------|----------------------|
|                  |                                                                                                         | Reported                                                     | Clinically confirmed | Reported                                                                | Clinically confirmed | Reported                             | Clinically confirmed |
| <b>CoronaVac</b> |                                                                                                         |                                                              |                      |                                                                         |                      |                                      |                      |
| Total            | 27.0 (25.7-28.4)                                                                                        | 75.3 (44.7-105.9)                                            | 66.9 (37.2- 96.6)    | 48.3 (17.6- 78.9)                                                       | 39.8 (10.1-69.6)     | 2.78 (1.85-4.19)                     | 2.47 (1.58-3.87)     |
| Male             | 29.6 (27.5-31.7)                                                                                        | 88.7 (45.7-131.6)                                            | 77.6 (36.1-119.2)    | 59.1 (16.1-102.1)                                                       | 48.1 (6.5-89.6)      | 3.00 (1.84-4.89)                     | 2.62 (1.53-4.50)     |
| Female           | 25.0 (23.3-26.7)                                                                                        | 55.9 (15.1- 96.6)                                            | 51.9 (11.9- 91.9)    | 30.8 ( -9.9- 71.6)                                                      | 26.9 (-13.1-66.9)    | 2.23 (1.07-4.64)                     | 2.08 (0.96-4.50)     |
| <b>Comirnaty</b> |                                                                                                         |                                                              |                      |                                                                         |                      |                                      |                      |
| Total            | 26.8 (25.3-28.2)                                                                                        | 57.8 (30.1- 85.5)                                            | 42.8 (19.4- 66.1)    | 31.0 (3.3- 58.8)                                                        | 16.0 ( -7.4-39.4)    | 2.16 (1.33-3.50)                     | 1.60 (0.92-2.77)     |
| Male             | 29.3 (27.0-31.5)                                                                                        | 65.5 (26.9-104.2)                                            | 46.1 (14.6- 77.5)    | 36.3 ( -2.5- 75.0)                                                      | 16.8 (-14.8-48.3)    | 2.24 (1.23-4.06)                     | 1.57 (0.79-3.13)     |
| Female           | 24.7 (22.8-26.6)                                                                                        | 46.1 (8.7- 83.5)                                             | 36.4 (4.2- 68.7)     | 21.4 (-16.1- 58.8)                                                      | 11.7 (-20.6-44.0)    | 1.86 (0.83-4.21)                     | 1.47 (0.61-3.58)     |

\*The background incidence rates were calculated using the same reporting period from 2015 to 2019 as for each vaccination programme in 2021 (for CoronaVac, February 23, 2021-May 4, 2021; For Comirnaty, March 6, 2021-May 4, 2021).

Supplementary Table 6. Standardised rate ratios of reported and clinically confirmed Bell's palsy cases following vaccination with CoronaVac and Comirnaty by sex, excluding Bell's palsy cases with onset time less than 1 day after vaccination.

|                  | Age-standardised background incidence rate in 2020* per 100,000 person-years (95% CI) | Age-standardised incidence per 100,000 person-years (95% CI) |                      | Age-standardised incidence difference per 100,000 person-years (95% CI) |                      | Age-standardised rate ratio (95% CI) |                      |
|------------------|---------------------------------------------------------------------------------------|--------------------------------------------------------------|----------------------|-------------------------------------------------------------------------|----------------------|--------------------------------------|----------------------|
|                  |                                                                                       | Reported                                                     | Clinically confirmed | Reported                                                                | Clinically confirmed | Reported                             | Clinically confirmed |
| <b>CoronaVac</b> |                                                                                       |                                                              |                      |                                                                         |                      |                                      |                      |
| Total            | 25.3 (22.6-28.1)                                                                      | 64.8 (36.8- 92.7)                                            | 58.1 (31.0-85.3)     | 39.4 (11.4-67.5)                                                        | 32.8 (5.5-60.1)      | 2.56 (1.64-3.99)                     | 2.29 (1.42-3.71)     |
| Male             | 29.0 (24.5-33.4)                                                                      | 70.5 (33.5-107.5)                                            | 62.4 (26.6-98.2)     | 41.5 (4.3-78.8)                                                         | 33.4 (-2.6-69.5)     | 2.43 (1.41-4.20)                     | 2.15 (1.19-3.90)     |
| Female           | 22.4 (18.9-26.0)                                                                      | 55.9 (15.1- 96.6)                                            | 51.9 (11.9-91.9)     | 33.4 (-7.4-74.3)                                                        | 29.5 (-10.6-69.6)    | 2.49 (1.18-5.25)                     | 2.31 (1.05-5.08)     |
| <b>Comirnaty</b> |                                                                                       |                                                              |                      |                                                                         |                      |                                      |                      |
| Total            | 25.7 (22.7-28.8)                                                                      | 57.8 (30.1- 85.5)                                            | 42.8 (19.4-66.1)     | 32.1 (4.2-59.9)                                                         | 17.0 (-6.6-40.6)     | 2.25 (1.37-3.68)                     | 1.66 (0.95-2.91)     |
| Male             | 28.9 (24.1-33.8)                                                                      | 65.5 (26.9-104.2)                                            | 46.1 (14.6-77.5)     | 36.6 (-2.3-75.5)                                                        | 17.1 (-14.7-49.0)    | 2.26 (1.23-4.18)                     | 1.59 (0.79-3.22)     |
| Female           | 23.1 (19.2-27.0)                                                                      | 46.1 (8.7- 83.5)                                             | 36.4 (4.2-68.7)      | 23.0 (-14.6-60.5)                                                       | 13.3 (-19.2-45.8)    | 1.99 (0.87-4.56)                     | 1.58 (0.64-3.88)     |

\*The background incidence rates were calculated using the same reporting period in 2020 as for each vaccination programme in 2021 (for CoronaVac, February 23, 2021-May 4, 2021; For Comirnaty, March 6, 2021-May 4, 2021).

Supplementary Table 7. Standardised rate ratios of reported and clinically confirmed Bell's palsy cases following vaccination with CoronaVac and Comirnaty by sex, assuming actual background incidence rates were 50% higher than reported.

|                  | Age-standardised background incidence rate in 2020* per 100,000 person-years (95% CI) | Age-standardised incidence per 100,000 person-years (95% CI) |                      | Age-standardised incidence difference per 100,000 person-years (95% CI) |                      | Age-standardised rate ratio (95% CI) |                      |
|------------------|---------------------------------------------------------------------------------------|--------------------------------------------------------------|----------------------|-------------------------------------------------------------------------|----------------------|--------------------------------------|----------------------|
|                  |                                                                                       | Reported                                                     | Clinically confirmed | Reported                                                                | Clinically confirmed | Reported                             | Clinically confirmed |
| <b>CoronaVac</b> |                                                                                       |                                                              |                      |                                                                         |                      |                                      |                      |
| Total            | 38.0 (34.6-41.4)                                                                      | 75.3 (44.7-105.9)                                            | 66.9 (37.2- 96.6)    | 37.3 (6.5-68.1)                                                         | 28.9 (-1.0-58.8)     | 1.98 (1.31-3.00)                     | 1.76 (1.12-2.77)     |
| Male             | 43.4 (38.0-48.9)                                                                      | 88.7 (45.7-131.6)                                            | 77.6 (36.1-119.2)    | 45.2 (2.0-88.5)                                                         | 34.2 (-7.7-76.1)     | 2.04 (1.24-3.37)                     | 1.79 (1.03-3.10)     |
| Female           | 33.6 (29.3-38.0)                                                                      | 55.9 (15.1- 96.6)                                            | 51.9 (11.9- 91.9)    | 22.2 (-18.7-63.1)                                                       | 18.3 (-21.9-58.5)    | 1.66 (0.79-3.48)                     | 1.54 (0.71-3.37)     |
| <b>Comirnaty</b> |                                                                                       |                                                              |                      |                                                                         |                      |                                      |                      |
| Total            | 38.6 (34.9-42.3)                                                                      | 57.8 (30.1- 85.5)                                            | 42.8 (19.4- 66.1)    | 19.2 (-8.8-47.2)                                                        | 4.2 (-19.5-27.8)     | 1.50 (0.92-2.44)                     | 1.11 (0.64-1.93)     |
| Male             | 43.4 (37.5-49.3)                                                                      | 65.5 (26.9-104.2)                                            | 46.1 (14.6- 77.5)    | 22.1 (-17.0-61.2)                                                       | 2.7 (-29.4-34.7)     | 1.51 (0.82-2.77)                     | 1.06 (0.53-2.13)     |
| Female           | 34.7 (29.9-39.5)                                                                      | 46.1 (8.7- 83.5)                                             | 36.4 (4.2- 68.7)     | 11.4 (-26.3-49.1)                                                       | 1.7 (-30.9-34.3)     | 1.33 (0.58-3.03)                     | 1.05 (0.43-2.57)     |

\*The background incidence rates were calculated using the same reporting period in 2020 as for each vaccination programme in 2021 (for CoronaVac, February 23, 2021-May 4, 2021; For Comirnaty, March 6, 2021-May 4, 2021).

Supplementary Table 8. Baseline characteristics of case and controls in the nested case-control study, stratified by vaccine exposure.

|                                                       | <b>Cases</b>                 |                            |                            | <b>Controls</b>               |                            |                            |
|-------------------------------------------------------|------------------------------|----------------------------|----------------------------|-------------------------------|----------------------------|----------------------------|
|                                                       | <b>No vaccine</b><br>(N=256) | <b>CoronaVac</b><br>(N=28) | <b>Comirnaty</b><br>(N=14) | <b>No vaccine</b><br>(N=1097) | <b>CoronaVac</b><br>(N=53) | <b>Comirnaty</b><br>(N=31) |
| Age - mean (SD)                                       | 57.62 (17.62)                | 56.76 (15.11)              | 52.38 (16.35)              | 57.63 (17.47)                 | 56.47 (12.88)              | 50.07 (13.62)              |
| Male – no. (%)                                        | 128 (50.0)                   | 22 (78.6)                  | 8 (57.1)                   | 575 (52.4)                    | 35 (66.0)                  | 17 (54.8)                  |
| Admission setting – no. (%)                           |                              |                            |                            |                               |                            |                            |
| Inpatient                                             | 98 (38.3)                    | 8 (28.6)                   | 6 (42.9)                   | 425 (38.7)                    | 14 (26.4)                  | 8 (25.8)                   |
| Emergency room                                        | 158 (61.7)                   | 20 (71.4)                  | 8 (57.1)                   | 672 (61.3)                    | 39 (73.6)                  | 23 (74.2)                  |
| Smoker – no. (%)                                      | 2 (0.8)                      | 0 (0.0)                    | 0 (0.0)                    | 10 (0.9)                      | 0 (0.0)                    | 0 (0.0)                    |
| <b><i>Pre-existing comorbidities</i></b> † – no. (%)  |                              |                            |                            |                               |                            |                            |
| Diabetes mellitus                                     | 55 (21.5)                    | 3 (10.7)                   | 0 (0.0)                    | 189 (17.2)                    | 3 (5.7)                    | 6 (19.4)                   |
| Hypertension                                          | 79 (30.9)                    | 5 (17.9)                   | 0 (0.0)                    | 319 (29.1)                    | 11 (20.8)                  | 7 (22.6)                   |
| Asthma                                                | 7 (2.7)                      | 0 (0.0)                    | 0 (0.0)                    | 26 (2.4)                      | 0 (0.0)                    | 0 (0.0)                    |
| Neoplasms                                             | 14 (5.5)                     | 0 (0.0)                    | 0 (0.0)                    | 147 (13.4)                    | 3 (5.7)                    | 1 (3.2)                    |
| Acute respiratory infections                          | 1 (0.4)                      | 0 (0.0)                    | 0 (0.0)                    | 14 (1.3)                      | 0 (0.0)                    | 0 (0.0)                    |
| Viral infections                                      | 3 (1.2)                      | 0 (0.0)                    | 1 (7.1)                    | 2 (0.2)                       | 0 (0.0)                    | 0 (0.0)                    |
| Rheumatoid Arthritis                                  | 0 (0.0)                      | 0 (0.0)                    | 1 (7.1)                    | 5 (0.5)                       | 0 (0.0)                    | 0 (0.0)                    |
| Head trauma                                           | 0 (0.0)                      | 0 (0.0)                    | 0 (0.0)                    | 0 (0.0)                       | 0 (0.0)                    | 0 (0.0)                    |
| Stroke                                                | 17 (6.6)                     | 1 (3.6)                    | 0 (0.0)                    | 68 (6.2)                      | 1 (1.9)                    | 0 (0.0)                    |
| Guillain–Barré syndrome                               | 0 (0.0)                      | 0 (0.0)                    | 0 (0.0)                    | 0 (0.0)                       | 0 (0.0)                    | 0 (0.0)                    |
| Migraine                                              | 2 (0.8)                      | 0 (0.0)                    | 0 (0.0)                    | 7 (0.6)                       | 0 (0.0)                    | 0 (0.0)                    |
| <b><i>Medication use within 90 days</i></b> – no. (%) |                              |                            |                            |                               |                            |                            |
| Antiviral drugs                                       | 12 (4.7)                     | 0 (0.0)                    | 1 (7.1)                    | 35 (3.2)                      | 4 (7.5)                    | 1 (3.2)                    |
| Systemic corticosteroids                              | 18 (7.0)                     | 1 (3.6)                    | 0 (0.0)                    | 48 (4.4)                      | 0 (0.0)                    | 0 (0.0)                    |
| Antibacterial drugs                                   | 20 (7.8)                     | 1 (3.6)                    | 0 (0.0)                    | 156 (14.2)                    | 0 (0.0)                    | 0 (0.0)                    |
| Immunosuppressants                                    | 1 (0.4)                      | 0 (0.0)                    | 0 (0.0)                    | 24 (2.2)                      | 0 (0.0)                    | 0 (0.0)                    |
| Statins                                               | 73 (28.5)                    | 5 (17.9)                   | 1 (7.1)                    | 302 (27.5)                    | 8 (15.1)                   | 5 (16.1)                   |

|           |         |         |         |         |         |         |
|-----------|---------|---------|---------|---------|---------|---------|
| Isoniazid | 0 (0.0) | 0 (0.0) | 0 (0.0) | 3 (0.3) | 0 (0.0) | 0 (0.0) |
|-----------|---------|---------|---------|---------|---------|---------|

†For pre-existing comorbidities, diagnosis within 90 days before index date were considered for acute respiratory infections and viral infections, and diagnosis before index date were considered for other diseases.

Supplementary Table 9. Risks of Bell's palsy among participants in the nested case-control study, excluding cases and controls with onset time less than 1 day after vaccination.

|                          | <b>Case patients<br/>(N=296)</b> | <b>Controls<br/>(N=1174)</b> | <b>Crude odds ratio<br/>(95% CI)</b> | <b>P-value</b> | <b>Adjusted odds ratio<br/>(95% CI)</b> | <b>P-value</b> |
|--------------------------|----------------------------------|------------------------------|--------------------------------------|----------------|-----------------------------------------|----------------|
| <b>Total</b>             |                                  |                              |                                      |                |                                         |                |
| Not vaccinated           | 256                              | 1090                         | (Ref)                                |                | (Ref)                                   |                |
| CoronaVac                | 26                               | 51                           | 2.362 (1.403 – 3.978)                | 0.0012         | 2.296 (1.341 – 3.932)                   | 0.0025         |
| Comirnaty                | 14                               | 29                           | 2.223 (1.132 – 4.368)                | 0.02           | 1.901 (0.949 – 3.81)                    | 0.07           |
| <b>Subgroup analysis</b> |                                  |                              |                                      |                |                                         |                |
| <b>Male</b>              |                                  |                              |                                      |                |                                         |                |
| Not vaccinated           | 128                              | 568                          | (Ref)                                |                | (Ref)                                   |                |
| CoronaVac                | 20                               | 34                           | 2.894 (1.544 – 5.426)                | 0.0009         | 2.658 (1.392 – 5.075)                   | 0.0031         |
| Comirnaty                | 8                                | 15                           | 2.514 (1.023 – 6.178)                | 0.044          | 2.234 (0.908 – 5.497)                   | 0.08           |
| <b>Female</b>            |                                  |                              |                                      |                |                                         |                |
| Not vaccinated           | 128                              | 522                          | (Ref)                                |                | (Ref)                                   |                |
| CoronaVac                | 6                                | 17                           | 1.507 (0.568 – 3.999)                | 0.41           | 1.428 (0.526 – 3.877)                   | 0.48           |
| Comirnaty                | 6                                | 14                           | 1.882 (0.678 – 5.221)                | 0.22           | 1.784 (0.633 – 5.03)                    | 0.27           |
| <b>Age&lt;60</b>         |                                  |                              |                                      |                |                                         |                |
| Not vaccinated           | 125                              | 533                          | (Ref)                                |                | (Ref)                                   |                |
| CoronaVac                | 13                               | 27                           | 2.256 (1.078 – 4.72)                 | 0.031          | 2.295 (1.081 – 4.872)                   | 0.03           |
| Comirnaty                | 10                               | 22                           | 1.998 (0.914 – 4.368)                | 0.083          | 1.803 (0.818 – 3.977)                   | 0.14           |
| <b>Age≥60</b>            |                                  |                              |                                      |                |                                         |                |
| Not vaccinated           | 131                              | 557                          | (Ref)                                |                | (Ref)                                   |                |
| CoronaVac                | 13                               | 24                           | 2.507 (1.197 – 5.252)                | 0.015          | 2.508 (1.152 – 5.463)                   | 0.021          |

|                                |     |       |                        |        |                        |        |
|--------------------------------|-----|-------|------------------------|--------|------------------------|--------|
| Comirnaty                      | 4   | 7     | 3.095 (0.795 – 12.047) | 0.1    | 2.372 (0.522 – 10.785) | 0.26   |
| Post-hoc analysis              |     |       |                        |        |                        |        |
| Within 14 days                 |     |       |                        |        |                        |        |
| between                        |     |       |                        |        |                        |        |
| vaccination and                |     |       |                        |        |                        |        |
| diagnosis of Bell's            |     |       |                        |        |                        |        |
| palsy                          |     |       |                        |        |                        |        |
| Not vaccinated                 | 256 | 1,016 | (Ref)                  |        | (Ref)                  |        |
| CoronaVac                      | 12  | 19    | 2.896 (1.273 - 6.588)  | 0.0112 | 2.800 (1.210 - 6.480)  | 0.0162 |
| Comirnaty                      | 6   | 17    | 1.423 (0.545 - 3.713)  | 0.4716 | 1.202 (0.458 - 3.156)  | 0.7082 |
| Larger than 14 days            |     |       |                        |        |                        |        |
| between                        |     |       |                        |        |                        |        |
| vaccination and                |     |       |                        |        |                        |        |
| diagnosis of Bell's            |     |       |                        |        |                        |        |
| palsy                          |     |       |                        |        |                        |        |
| Not vaccinated                 | 256 | 1,029 | (Ref)                  |        | (Ref)                  |        |
| CoronaVac                      | 14  | 22    | 2.568 (1.282 - 5.144)  | 0.0078 | 2.456 (1.179 - 5.117)  | 0.016  |
| Comirnaty                      | 8   | 9     | 3.962 (1.418 - 11.076) | 0.0087 | 3.785 (1.253 - 11.43)  | 0.018  |
| Completed 1 <sup>st</sup> dose |     |       |                        |        |                        |        |
| only                           |     |       |                        |        |                        |        |
| Not vaccinated                 | 256 | 1,031 | (Ref)                  |        | (Ref)                  |        |
| CoronaVac                      | 19  | 26    | 3.183 (1.663 - 6.091)  | 0.0005 | 3.081 (1.574 - 6.029)  | 0.0010 |
| Comirnaty                      | 5   | 16    | 1.229 (0.439 - 3.446)  | 0.69   | 0.967 (0.322 - 2.904)  | 0.95   |
| Completed 1 <sup>st</sup> and  |     |       |                        |        |                        |        |
| 2 <sup>nd</sup> dose           |     |       |                        |        |                        |        |
| Not vaccinated                 | 256 | 1014  | (Ref)                  |        | (Ref)                  |        |



|           |   |    |                       |       |                       |       |
|-----------|---|----|-----------------------|-------|-----------------------|-------|
| CoronaVac | 7 | 19 | 1.459 (0.592 - 3.599) | 0.41  | 1.457 (0.576 - 3.69)  | 0.43  |
| Comirnaty | 9 | 12 | 3.201 (1.287 - 7.962) | 0.012 | 3.162 (1.244 - 8.039) | 0.016 |

Cases and controls were matched according to age, sex, setting, and admission date. Odds ratios for Bell's palsy were estimated by conditional logistic regression adjusted for smoking status, pre-existing comorbidities (diabetes mellitus, hypertension, asthma, neoplasms, rheumatoid arthritis, stroke, migraine, infections in the past 90 days (acute respiratory infections, viral infections), and medication use in the past 90 days (antiviral drugs, systemic corticosteroids, antibacterial drugs, immunosuppressants). The list of confounders in the model for subgroup and post-hoc analyses is shown in the Supplementary table 10. CI denotes confidence interval.

Supplementary table 10. List of confounders in the regression model in the main and sensitivity analysis.

| Confounder                                  | Total | Subgroup and post-hoc analysis |        |        |        |                                                     |                                                      |                                        |                                                          |
|---------------------------------------------|-------|--------------------------------|--------|--------|--------|-----------------------------------------------------|------------------------------------------------------|----------------------------------------|----------------------------------------------------------|
|                                             |       | Male                           | Female | Age<60 | Age≥60 | ≤14 days<br>between<br>vaccination<br>and diagnosis | > 14 days<br>between<br>vaccination<br>and diagnosis | Completed<br>1 <sup>st</sup> dose only | Completed<br>1 <sup>st</sup> and 2 <sup>nd</sup><br>dose |
| Smoker                                      | ✓     | ✓                              | ×      | ✓      | ✓      | ✓                                                   | ✓                                                    | ✓                                      | ✓                                                        |
| <b><i>Pre-existing comorbidities†</i></b>   |       |                                |        |        |        |                                                     |                                                      |                                        |                                                          |
| Diabetes mellitus                           | ✓     | ✓                              | ✓      | ✓      | ✓      | ✓                                                   | ✓                                                    | ✓                                      | ✓                                                        |
| Hypertension                                | ✓     | ✓                              | ✓      | ✓      | ✓      | ✓                                                   | ✓                                                    | ✓                                      | ✓                                                        |
| Asthma                                      | ✓     | ✓                              | ✓      | ✓      | ✓      | ✓                                                   | ✓                                                    | ✓                                      | ✓                                                        |
| Neoplasms                                   | ✓     | ✓                              | ✓      | ✓      | ✓      | ✓                                                   | ✓                                                    | ✓                                      | ✓                                                        |
| Acute respiratory infections                | ✓     | ×                              | ✓      | ✓      | ×      | ✓                                                   | ✓                                                    | ✓                                      | ✓                                                        |
| Viral infections                            | ✓     | ×                              | ✓      | ×      | ✓      | ✓                                                   | ✓                                                    | ✓                                      | ✓                                                        |
| Rheumatoid Arthritis                        | ✓     | ×                              | ✓      | ✓      | ×      | ×                                                   | ✓                                                    | ✓                                      | ×                                                        |
| Stroke                                      | ✓     | ✓                              | ✓      | ✓      | ✓      | ✓                                                   | ✓                                                    | ✓                                      | ✓                                                        |
| Migraine                                    | ✓     | ✓                              | ✓      | ✓      | ×      | ✓                                                   | ✓                                                    | ✓                                      | ✓                                                        |
| <b><i>Medication use within 90 days</i></b> |       |                                |        |        |        |                                                     |                                                      |                                        |                                                          |
| Antiviral drugs                             | ✓     | ✓                              | ✓      | ✓      | ✓      | ✓                                                   | ✓                                                    | ✓                                      | ✓                                                        |
| Systemic corticosteroids                    | ✓     | ✓                              | ✓      | ✓      | ✓      | ✓                                                   | ✓                                                    | ✓                                      | ✓                                                        |

|                     |   |   |   |   |   |   |   |   |   |
|---------------------|---|---|---|---|---|---|---|---|---|
| Antibacterial drugs | ✓ | ✓ | ✓ | ✓ | ✓ | ✓ | ✓ | ✓ | ✓ |
| Immunosuppressants  | ✓ | ✓ | × | × | ✓ | ✓ | ✓ | ✓ | ✓ |
| Statins             | ✓ | ✓ | ✓ | ✓ | ✓ | ✓ | ✓ | ✓ | ✓ |

†For pre-existing comorbidities, diagnosis within 90 days before index date were considered for acute respiratory infections and viral infections, and diagnosis before index date were considered for other diseases.

✓ included in the regression model

× not included in the regression model due to very rare number in case and control groups (e.g. smoker status was excluded in the regression model in the female subgroup analysis as all female were non-smoker in current study.)

Supplementary Figure 1. Sample size calculation for nested case-control study

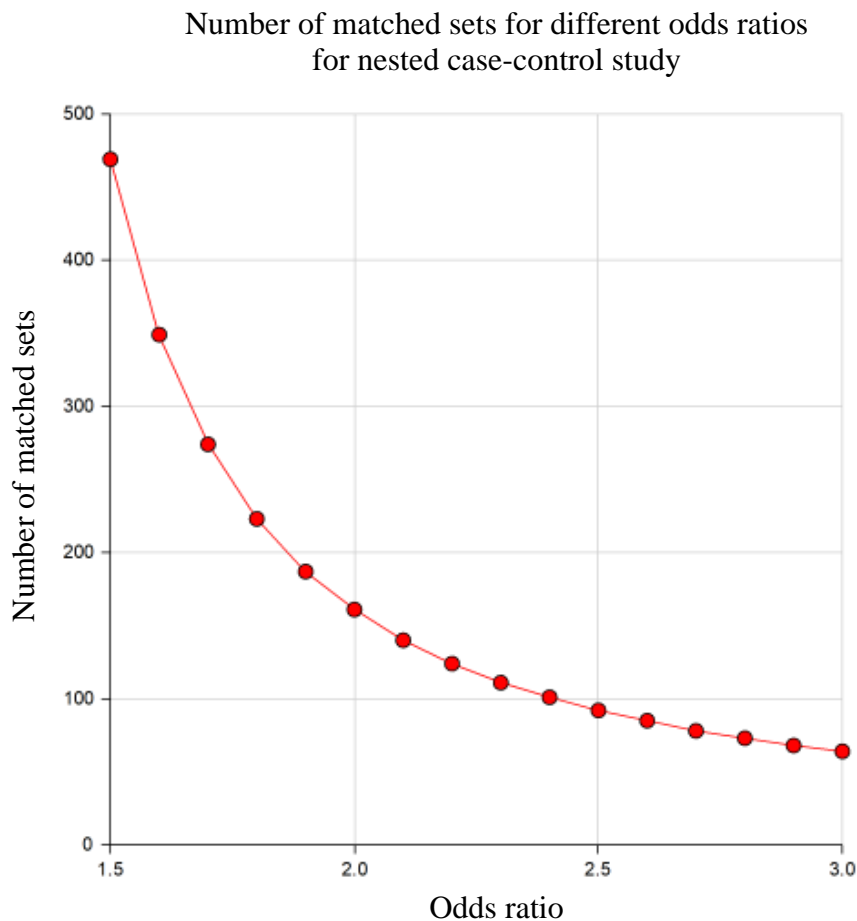

Remark: Assuming 15% of Hong Kong population aged 18 years with vaccination (1 million vaccine recipients among 6.5 million Hong Kong residents aged 18 years) by May 3 2021, the number of matched sets (1 case and 4 controls) ranging from 64 to 469 were required to achieve 80% power to detect the odds ratios from 1.5 to 3 at 0.05 significance level [1-3]. The red points were plotted for odds ratios from 1.5 to 3 by 0.1. The sample size calculation was conducted using the Power Analysis and Sample Size software version 2019 (NCSS, Kaysville, Utah, USA).

References:

1. Lachin, John M. Sample size evaluation for a multiply matched case-control study using the score test from a conditional logistic (discrete Cox PH) regression model. *Stat Med*, 2008;27:2509-2523.
2. Lachin, John M. *Biostatistical Methods: The Assessment of Relative Risks*, Second Edition. John Wiley & Sons, 2011.
3. Tang, Yongqiang. Comments on 'Sample size evaluation for multiply matched case-control study using the score test from a conditional logistic (discrete Cox PH) regression model. *Stat Med*, 2009;28:175-177.

Supplementary Figure 2. Onset distribution of clinically confirmed Bell’s palsy cases by number of days past the most recent dose of vaccination

Percentage of Bell's palsy Cases by Number of Days past CoronaVac (n=27\*) or Comirnaty (n=16) Vaccination

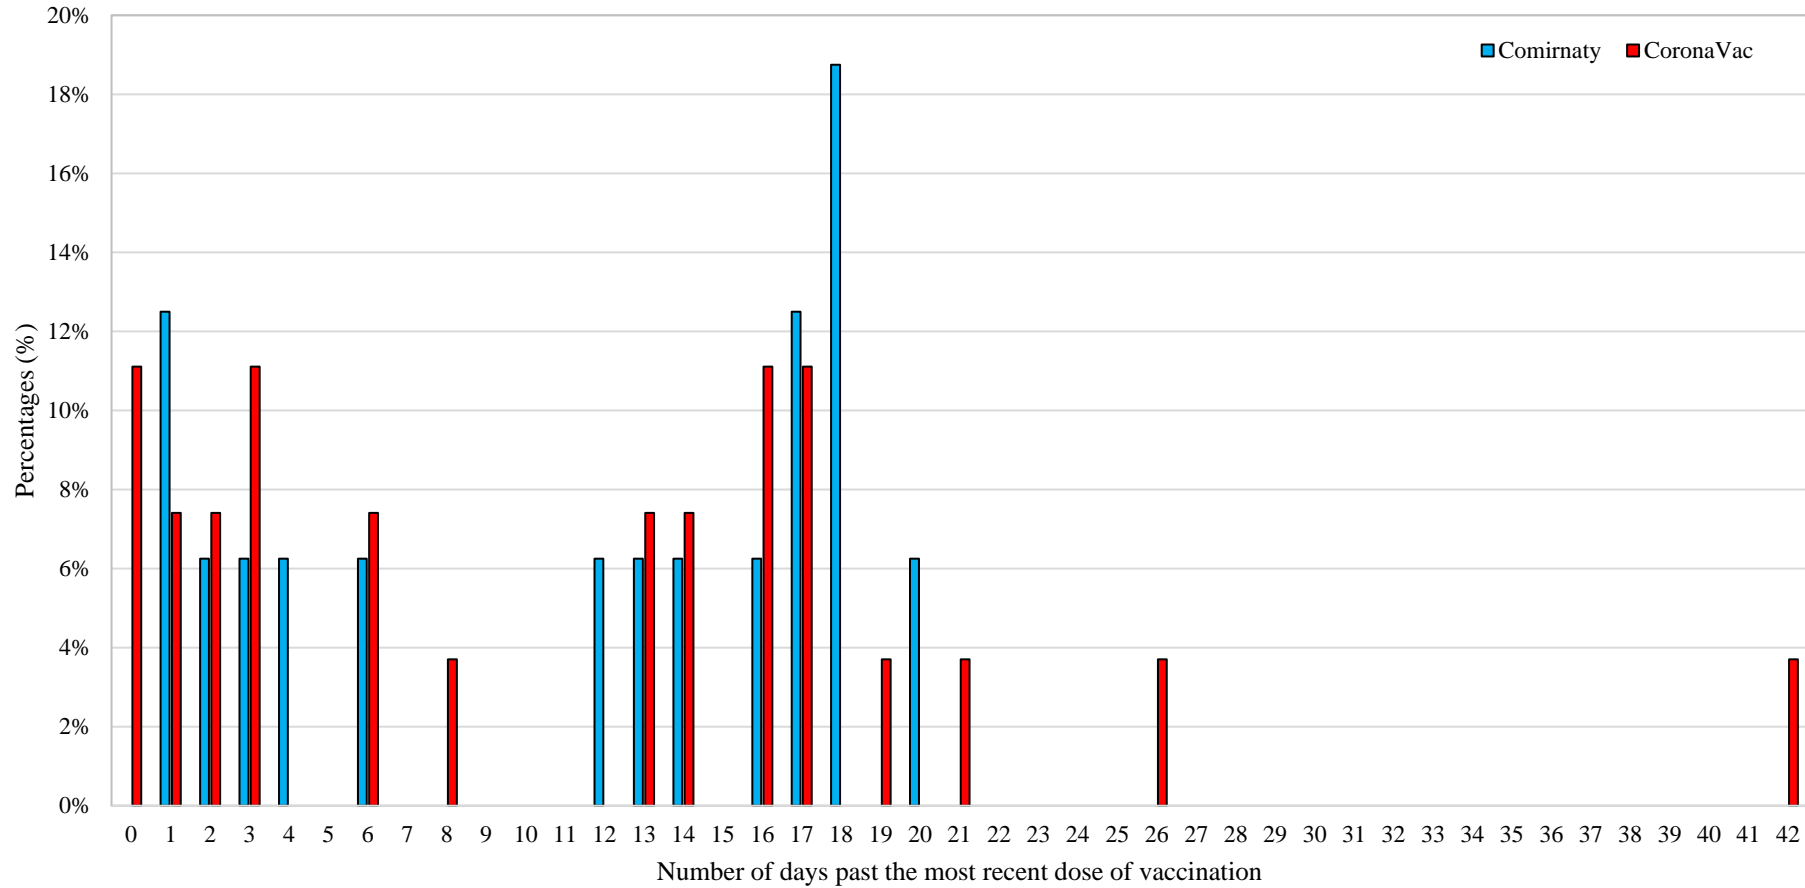

\*Remark: There are 28 clinically confirmed Bell’s palsy cases for CoronaVac. However, the onset date in one clinically confirmed Bell’s palsy case following CoronaVac vaccination (Case no S18 in the Supplementary Table 2) is uncertain, and thus this case was excluded from the figure.

Supplementary information 1. The details of WHO classification.

The Expert Committee conducted causality assessment of clinically confirmed cases according to the WHO classification<sup>1</sup>.

A. Consistent causal association to immunization

- A1. Vaccine product-related reaction; or
- A2. Vaccine quality defect-related reaction; or
- A3. Immunization error-related reaction; or
- A4. Immunization anxiety-related reaction/Immunization stress related response (ISRR).

B. Indeterminate

- B1. Temporal relationship is consistent but there is insufficient definitive evidence that vaccine caused the event (it may be a new vaccine-linked event). This is a potential signal and needs to be considered for further investigation.
- B2. Reviewing factors result in conflicting trends of consistency and inconsistency with causal association to immunization (i.e. it may be vaccine-associated as well as coincidental and it is not possible clearly to favour one or the other).

C. Inconsistent causal association to immunization (coincidental). This could be due to underlying or emerging condition(s) or conditions caused by exposure to something other than vaccine. Events which could have occurred naturally are generally assigned to this classification.

D. Case without adequate information for causality conclusion.

Reference

1. World Health Organization. Causality assessment of an adverse event following immunization (AEFI): user manual for the revised WHO classification. <https://apps.who.int/iris/bitstream/handle/10665/259959/9789241513654-eng.pdf?sequence=1&isAllowed=y>.

Supplementary information 2. The details information of Clinical Data Analysis and Reporting System.

Hospital Authority has a comprehensive electronic health records system for clinical management. Each resident in Hong Kong has a unique Hong Kong Identity Card Number which allows the HA to create a unique electronic health record for each patient to link up all hospitals, ambulatory clinics, specialist clinics, general out-patients clinics, and emergency rooms. Data from the HA electronic health records are de-identified and pseudo-anonymised data are then transferred daily to Clinical Data Analysis and Reporting System (CDARS). Since 1995, the pseudo-anonymised clinical data from patients who had ever used any of the healthcare services at HA, including demographics, diagnosis, medication dispensing records, outpatient and primary care clinics, emergency room attendances, laboratory tests and hospitalisation details, have been made available on CDARS for research and audit purposes. CDARS has been used for pharmacovigilance studies to evaluate safety of medicine<sup>1-4</sup>.

#### Reference

1. Lau WC, Chan EW, Cheung CL, et al. Association Between Dabigatran vs Warfarin and Risk of Osteoporotic Fractures Among Patients With Nonvalvular Atrial Fibrillation. *JAMA* 2017; 317(11): 1151-8.
2. Lau WCY, Cheung CL, Man KKC, et al. Association Between Treatment With Apixaban, Dabigatran, Rivaroxaban, or Warfarin and Risk for Osteoporotic Fractures Among Patients With Atrial Fibrillation: A Population-Based Cohort Study. *Ann Intern Med* 2020; 173(1): 1-9.
3. Man KKC, Chan EW, Ip P, et al. Prenatal antidepressant use and risk of attention-deficit/hyperactivity disorder in offspring: population based cohort study. *BMJ* 2017; 357: j2350.
4. Man KKC, Lau WCY, Coghill D, et al. Association between methylphenidate treatment and risk of seizure: a population-based, self-controlled case-series study. *Lancet Child Adolesc Health* 2020; 4(6): 435-43.
